# Supplementary material for: Fertility-preserving myeloablative conditioning using single-dose CD117 antibody-drug conjugate in a rhesus gene therapy model
Source: PubMed Central journal article supplement (PMC10570335; doi:10.1038/s41467-023-41153-5), 2023-10-12
Supplement: 41467_2023_41153_MOESM2_ESM.pdf [file 41467_2023_41153_MOESM2_ESM.pdf]

## Reporting Summary

Nature Portfolio wishes to improve the reproducibility of the work that we publish. This form provides structure for consistency and transparency in reporting. For further information on Nature Portfolio policies, see our [Editorial Policies](#) and the [Editorial Policy Checklist](#).

### Statistics

For all statistical analyses, confirm that the following items are present in the figure legend, table legend, main text, or Methods section.

- | n/a                                 | Confirmed                                                                                                                                                                                                                                                                                      |
|-------------------------------------|------------------------------------------------------------------------------------------------------------------------------------------------------------------------------------------------------------------------------------------------------------------------------------------------|
| <input type="checkbox"/>            | <input checked="" type="checkbox"/> The exact sample size ( $n$ ) for each experimental group/condition, given as a discrete number and unit of measurement                                                                                                                                    |
| <input type="checkbox"/>            | <input checked="" type="checkbox"/> A statement on whether measurements were taken from distinct samples or whether the same sample was measured repeatedly                                                                                                                                    |
| <input type="checkbox"/>            | <input checked="" type="checkbox"/> The statistical test(s) used AND whether they are one- or two-sided<br><i>Only common tests should be described solely by name; describe more complex techniques in the Methods section.</i>                                                               |
| <input checked="" type="checkbox"/> | <input type="checkbox"/> A description of all covariates tested                                                                                                                                                                                                                                |
| <input type="checkbox"/>            | <input checked="" type="checkbox"/> A description of any assumptions or corrections, such as tests of normality and adjustment for multiple comparisons                                                                                                                                        |
| <input type="checkbox"/>            | <input checked="" type="checkbox"/> A full description of the statistical parameters including central tendency (e.g. means) or other basic estimates (e.g. regression coefficient) AND variation (e.g. standard deviation) or associated estimates of uncertainty (e.g. confidence intervals) |
| <input type="checkbox"/>            | <input checked="" type="checkbox"/> For null hypothesis testing, the test statistic (e.g. $F$ , $t$ , $r$ ) with confidence intervals, effect sizes, degrees of freedom and $P$ value noted<br><i>Give <math>P</math> values as exact values whenever suitable.</i>                            |
| <input checked="" type="checkbox"/> | <input type="checkbox"/> For Bayesian analysis, information on the choice of priors and Markov chain Monte Carlo settings                                                                                                                                                                      |
| <input checked="" type="checkbox"/> | <input type="checkbox"/> For hierarchical and complex designs, identification of the appropriate level for tests and full reporting of outcomes                                                                                                                                                |
| <input checked="" type="checkbox"/> | <input type="checkbox"/> Estimates of effect sizes (e.g. Cohen's $d$ , Pearson's $r$ ), indicating how they were calculated                                                                                                                                                                    |

*Our web collection on [statistics for biologists](#) contains articles on many of the points above.*

### Software and code

Policy information about [availability of computer code](#)

Data collection

Data analysis

For manuscripts utilizing custom algorithms or software that are central to the research but not yet described in published literature, software must be made available to editors and reviewers. We strongly encourage code deposition in a community repository (e.g. GitHub). See the Nature Portfolio [guidelines for submitting code & software](#) for further information.

### Data

Policy information about [availability of data](#)

All manuscripts must include a [data availability statement](#). This statement should provide the following information, where applicable:

- Accession codes, unique identifiers, or web links for publicly available datasets
- A description of any restrictions on data availability
- For clinical datasets or third party data, please ensure that the statement adheres to our [policy](#)

Source data are provided with this paper. The rhesus genome assembly rheMac10 is available in National Center for Biotechnology Information Datasets ([https://www.ncbi.nlm.nih.gov/datasets/genome/GCF\\_003339765.1/](https://www.ncbi.nlm.nih.gov/datasets/genome/GCF_003339765.1/)).

## Human research participants

Policy information about [studies involving human research participants and Sex and Gender in Research](#).

|                             |                                                                                                                                                        |
|-----------------------------|--------------------------------------------------------------------------------------------------------------------------------------------------------|
| Reporting on sex and gender | We didn't report the gender in human CD34+ cells, because these cells were used to evaluate the cross reactivity of CD117-ADC with rhesus CD34+ cells. |
| Population characteristics  | Human CD34+ cells were originated from steady-state bone marrow in healthy donors.                                                                     |
| Recruitment                 | It is based on STEMCELL technologies where we purchased human CD34+ cells.                                                                             |
| Ethics oversight            | It is based on STEMCELL technologies where we purchased human CD34+ cells.                                                                             |

Note that full information on the approval of the study protocol must also be provided in the manuscript.

## Field-specific reporting

Please select the one below that is the best fit for your research. If you are not sure, read the appropriate sections before making your selection.

Life sciences  Behavioural & social sciences  Ecological, evolutionary & environmental sciences

For a reference copy of the document with all sections, see [nature.com/documents/nr-reporting-summary-flat.pdf](https://www.nature.com/documents/nr-reporting-summary-flat.pdf)

## Life sciences study design

All studies must disclose on these points even when the disclosure is negative.

|                 |                                                                                                                                                                                                                                                                                                                                                                                                                                                                                                                                                                                                                                                                                                                                                                                                                                                                       |
|-----------------|-----------------------------------------------------------------------------------------------------------------------------------------------------------------------------------------------------------------------------------------------------------------------------------------------------------------------------------------------------------------------------------------------------------------------------------------------------------------------------------------------------------------------------------------------------------------------------------------------------------------------------------------------------------------------------------------------------------------------------------------------------------------------------------------------------------------------------------------------------------------------|
| Sample size     | <p>We used 3 human donors and 2 rhesus donors for the CD34+ cell killing assay in vitro, 3 cynomolgus macaques for each group in CD34+CD90+CD45RA- cell depletion assay in vivo, 3 cynomolgus macaques for each group in dose-escalating toxicity assay, 1 rhesus macaque for each group in clearance assay, 1 rhesus macaque for each group in dose-escalating toxicity assay, and 2 rhesus macaques for each group in CD34+ cells transplantation with lentiviral gene marking.</p> <p>Human CD34+ cells are limited resources due to the requirement of a healthy donor. In addition, non-human primates are limited, because they were preferentially used for COVID-19 vaccination studies. Therefore, we used minimal but sufficient numbers of donors (2-3 donors) for in vitro CD34+ cells experiments, as well as animals (1-3) for in vivo experiments.</p> |
| Data exclusions | No data was excluded from the analysis.                                                                                                                                                                                                                                                                                                                                                                                                                                                                                                                                                                                                                                                                                                                                                                                                                               |
| Replication     | We reproducibly observed the engraftment of lentivirally gene-modified cells in transplanted rhesus macaques following CD117-ADC conditioning (6 replicates).                                                                                                                                                                                                                                                                                                                                                                                                                                                                                                                                                                                                                                                                                                         |
| Randomization   | We evaluated multiple doses of CD117-ADC in identical conditions for each experiment. Randomization is not relevant to this non-clinical study.                                                                                                                                                                                                                                                                                                                                                                                                                                                                                                                                                                                                                                                                                                                       |
| Blinding        | Blinding is not relevant to this non-clinical study, since there was no allocation of participants to experimental groups. Therefore, we carefully designed each experiment to collect objective data, such as cell viability by flow cytometry, vector copy number by quantitative PCR, and globin protein amounts by HPLC. In fact, technicians for data collection and analysis were mostly blinded, since only limited information (animal ID and analysis methods) was provided. However, there is no formal blinding.                                                                                                                                                                                                                                                                                                                                           |

## Reporting for specific materials, systems and methods

We require information from authors about some types of materials, experimental systems and methods used in many studies. Here, indicate whether each material, system or method listed is relevant to your study. If you are not sure if a list item applies to your research, read the appropriate section before selecting a response.

## Materials &amp; experimental systems

| n/a                                 | Involvement                                                     |
|-------------------------------------|-----------------------------------------------------------------|
| <input type="checkbox"/>            | <input checked="" type="checkbox"/> Antibodies                  |
| <input type="checkbox"/>            | <input checked="" type="checkbox"/> Eukaryotic cell lines       |
| <input checked="" type="checkbox"/> | <input type="checkbox"/> Palaeontology and archaeology          |
| <input type="checkbox"/>            | <input checked="" type="checkbox"/> Animals and other organisms |
| <input checked="" type="checkbox"/> | <input type="checkbox"/> Clinical data                          |
| <input checked="" type="checkbox"/> | <input type="checkbox"/> Dual use research of concern           |

## Methods

| n/a                                 | Involvement                                        |
|-------------------------------------|----------------------------------------------------|
| <input checked="" type="checkbox"/> | <input type="checkbox"/> ChIP-seq                  |
| <input type="checkbox"/>            | <input checked="" type="checkbox"/> Flow cytometry |
| <input checked="" type="checkbox"/> | <input type="checkbox"/> MRI-based neuroimaging    |

## Antibodies

## Antibodies used

We used antibodies specific for CD34 (clone 561, Biolegend, 343626), CD90 (Clone 5E10, BioLegend, 328114), CD45RA (clone T6D11, Miltenyi Biotec, 130-113-360), fetal hemoglobin (clone 2D12, BD Biosciences, 551796), CD4 (clone L200, BD Biosciences, 550630), CD8 (clone G42-8, BD Biosciences, 749034), CD11b (clone D12, BD Biosciences, 742643), CD14 (clone M5E2, BD Biosciences, 561712), CD16 (clone 3G8, BD Biosciences, 560918) CD18 (clone 6.7, BD Biosciences, 752220), CD20 (clone 2H7, BD Biosciences, 560734/560853), CD45 (clone D058-1283, BD Biosciences, 561291), and CD56 (clone B159, BD Biosciences, 555518).

## Validation

The antibodies are validated on the manufacturer's website.

CD34, Reactivity: Human, Cynomolgus, and Rhesus, Application: flow cytometry, Full description: <https://www.biolegend.com/fr-ch/products/brilliant-violet-785-anti-human-cd34-antibody-13790>

CD90, Reactivity: Human, African Green, Baboon, Cynomolgus, Pigtailed Macaque, Rhesus, and Pig, Application: flow cytometry, Full description: <https://www.biolegend.com/en-us/products/apc-anti-human-cd90-thy1-antibody-4116>

CD45RA, Reactivity: Human, Cynomolgus, and Rhesus, Application: flow cytometry, Full description: <https://www.miltenyibiotec.com/US-en/products/cd45ra-antibody-anti-human-t6d11.html#conjugate=vioblue:size=100-tests-in-200-ul>

Fetal hemoglobin, Reactivity: Human, Application: Flow cytometry, Full description: <https://www.bdbiosciences.com/en-us/products/reagents/flow-cytometry-reagents/research-reagents/single-color-antibodies-ruo/purified-mouse-anti-human-fetal-hemoglobin.551796>

CD4, Reactivity: Human, Rhesus, Cynomolgus, and Baboon, Application: Flow cytometry, Full description: <https://www.bdbiosciences.com/en-us/products/reagents/flow-cytometry-reagents/research-reagents/single-color-antibodies-ruo/pe-mouse-anti-human-cd4.550630>

CD8, Reactivity: Human, Application: Flow cytometry, Full description: <https://www.bdbiosciences.com/en-us/products/reagents/flow-cytometry-reagents/research-reagents/single-color-antibodies-ruo/buv737-mouse-anti-human-cd8.749034>

CD11b, Reactivity: Human, Application: Flow cytometry, Full description: <https://www.bdbiosciences.com/en-us/products/reagents/flow-cytometry-reagents/research-reagents/single-color-antibodies-ruo/buv395-mouse-anti-human-cd11b.742643>

CD14, Reactivity: Human, Rhesus, Cynomolgus, Baboon, and Dog, Application: Flow cytometry, Full description: <https://www.bdbiosciences.com/en-us/products/reagents/flow-cytometry-reagents/research-reagents/single-color-antibodies-ruo/fitc-mouse-anti-human-cd14.561712>

CD16, Reactivity: Human, Application: Flow cytometry, Full description: <https://www.bdbiosciences.com/en-us/products/reagents/flow-cytometry-reagents/research-reagents/single-color-antibodies-ruo/pe-cy-7-mouse-anti-human-cd16.560918>

CD18, Reactivity: Human, Application: Flow cytometry, Full description: <https://www.bdbiosciences.com/en-us/products/reagents/flow-cytometry-reagents/research-reagents/single-color-antibodies-ruo/r718-mouse-anti-human-cd18.752220>

CD20, Reactivity: Human, Rhesus, Cynomolgus, and Baboon, Application: Flow cytometry, Full description: <https://www.bdbiosciences.com/en-us/products/reagents/flow-cytometry-reagents/research-reagents/single-color-antibodies-ruo/apc-h7-mouse-anti-human-cd20.560734>

CD45, Reactivity: Rhesus, Cynomolgus, and Baboon, Application: Flow cytometry, Full description: <https://www.bdbiosciences.com/en-us/products/reagents/flow-cytometry-reagents/research-reagents/single-color-antibodies-ruo/v450-mouse-anti-nhp-cd45.561291>

CD56, Reactivity: Human, Application: Flow cytometry, Full description: <https://www.bdbiosciences.com/en-us/products/reagents/flow-cytometry-reagents/research-reagents/single-color-antibodies-ruo/apc-mouse-anti-human-cd56-ncam-1.555518>

## Eukaryotic cell lines

Policy information about [cell lines and Sex and Gender in Research](#)

## Cell line source(s)

We obtained 293T and HeLa cell lines from American Type Culture Collection (ATCC).

|                                                                      |                                                                       |
|----------------------------------------------------------------------|-----------------------------------------------------------------------|
| Authentication                                                       | Both 293T and HeLa cell lines were authenticated by morphology.       |
| Mycoplasma contamination                                             | No mycoplasma contamination was confirmed by ATCC and our laboratory. |
| Commonly misidentified lines<br>(See <a href="#">ICLAC</a> register) | We didn't use any commonly misidentified cell lines in this study.    |

## Animals and other research organisms

Policy information about [studies involving animals](#); [ARRIVE guidelines](#) recommended for reporting animal research, and [Sex and Gender in Research](#)

|                         |                                                                                                                                                                                                                                                 |
|-------------------------|-------------------------------------------------------------------------------------------------------------------------------------------------------------------------------------------------------------------------------------------------|
| Laboratory animals      | We used 18 male cynomolgus macaques for CD34+CD90+CD45RA- cell depletion assay and dose-escalating toxicity assay that were 2.5-4 years old. We also used 2 male and 6 female rhesus macaques for transplantation that were 3-8 years old.      |
| Wild animals            | The study did not involve wild animals.                                                                                                                                                                                                         |
| Reporting on sex        | The use of female monkeys allows us to evaluate menstrual cycles following transplantation.                                                                                                                                                     |
| Field-collected samples | The study did not involve samples collected from the field.                                                                                                                                                                                     |
| Ethics oversight        | We follow the guidelines set out by the Public Health Service Policy on Humane Care and Use of Laboratory Animals under a protocol (H-0136) approved by the Animal Care and Use Committee of National Heart, Lung, and Blood Institute (NHLBI). |

Note that full information on the approval of the study protocol must also be provided in the manuscript.

## Flow Cytometry

### Plots

Confirm that:

- The axis labels state the marker and fluorochrome used (e.g. CD4-FITC).
- The axis scales are clearly visible. Include numbers along axes only for bottom left plot of group (a 'group' is an analysis of identical markers).
- All plots are contour plots with outliers or pseudocolor plots.
- A numerical value for number of cells or percentage (with statistics) is provided.

### Methodology

|                           |                                                                                                                            |
|---------------------------|----------------------------------------------------------------------------------------------------------------------------|
| Sample preparation        | The cells were incubated with fluorescent-conjugated antibodies according to the company protocol.                         |
| Instrument                | We used FACSCelesta (BD Biosciences) in CD34+ cell killing assay and FACSCanto (BD Biosciences) in rhesus transplantation. |
| Software                  | The FlowJo v10 (BD Biosciences) was used to analyze flow cytometry data.                                                   |
| Cell population abundance | We analyzed 1e4 cells in flow cytometry.                                                                                   |
| Gating strategy           | Unstained cells were used as a gating control.                                                                             |

Tick this box to confirm that a figure exemplifying the gating strategy is provided in the Supplementary Information.
